# Supplementary material for: Investigating the Impact of Smart Tourism Technologies on Tourists’ Experiences
Source: MDPI journal article supplement (doi:10.3390/su14053048), 2022-03-04
Supplement: s1 [file s1]

## Questionnaire:

### Research on the Impact of Smart Tourism Technologies (STTs) on Tourists' Experience

Thank you for taking the time out to fill in this questionnaire! Please fill in your honest opinion according to the actual situation. The information in this questionnaire is for academic research purposes only, and any personal information involved will be treated with absolute confidence.

The topic of our research project is the use of smart tourism technology by tourists and their influence on tourists' behavior.

#### SECTION 1: Uses of smart tourism technologies

**1.1 In your past travel experience, which smart tourism technologies have you used? (You may select more than an ✓) And How familiar are you with smart tourism technologies? (Only one choice ✓)**

| Have you used It?                                                                                                                                |  | Level of familiarity |                 |         |          |                    |
|--------------------------------------------------------------------------------------------------------------------------------------------------|--|----------------------|-----------------|---------|----------|--------------------|
|                                                                                                                                                  |  | Not familiar at all  | Simply familiar | Neutral | Familiar | Extremely familiar |
| 5G Communication technology                                                                                                                      |  |                      |                 |         |          |                    |
| Apps on devices                                                                                                                                  |  |                      |                 |         |          |                    |
| Radio Frequency Identification (RFID) <ul style="list-style-type: none"><li>• Access control system</li><li>• Car Park charging system</li></ul> |  |                      |                 |         |          |                    |
| Geolocation/GPS                                                                                                                                  |  |                      |                 |         |          |                    |
| Cloud computing (data accessible and ready to use anytime and anywhere)                                                                          |  |                      |                 |         |          |                    |
| Artificial Intelligence                                                                                                                          |  |                      |                 |         |          |                    |
| Ubiquitous connection between Wi-Fi and other networks (Wi-Fi)                                                                                   |  |                      |                 |         |          |                    |
| Virtual Reality                                                                                                                                  |  |                      |                 |         |          |                    |
| Augmented Reality                                                                                                                                |  |                      |                 |         |          |                    |
| Social networks/Embedded on own website <ul style="list-style-type: none"><li>• Online/viral communities</li></ul>                               |  |                      |                 |         |          |                    |

#### 1.2 Overall, How familiar are you with smart tourism technologies?

|                      | Not familiar at all | Simply familiar | Neutral | Familiar | Extremely familiar |
|----------------------|---------------------|-----------------|---------|----------|--------------------|
| Level of familiarity |                     |                 |         |          |                    |

#### 1.3 Motivations: Reasons for using smart technologies (You may select more than an '✓)

| Reasons             | YES | NO |
|---------------------|-----|----|
| Tourism and Leisure |     |    |
| Games               |     |    |
| Education           |     |    |
| Entertainment       |     |    |

|                         |  |  |
|-------------------------|--|--|
| Work                    |  |  |
| Other reasons (specify) |  |  |

## SECTION 2: ATTRIBUTES OF SMART TOURISM TECHNOLOGIES (STTs)

The respondent is asked to consider the following statements and express his/her opinion, level of agreement on these ((*Only one choice ✓*))

### 2.1 INFORMATION

|                                                                                                          | Strongly disagree | Disagree | Somewhat disagree | Neutral/ Undecided | Somewhat agree | Agree | Strongly agree |
|----------------------------------------------------------------------------------------------------------|-------------------|----------|-------------------|--------------------|----------------|-------|----------------|
|                                                                                                          | (1)               | (2)      | (3)               | (4)                | (5)            | (6)   | (7)            |
| INF1: Information provided about my travels on smart tourism technologies is useful/helpful              |                   |          |                   |                    |                |       |                |
| INF2: Smart tourism technologies enable me to complete my travels with reliable and detailed information |                   |          |                   |                    |                |       |                |
| INF3: Smart tourism technologies contribute to minimize my travel concerns                               |                   |          |                   |                    |                |       |                |

### 2.2 ACCESSIBILITY

|                                                                                                        | Strongly disagree | Disagree | Somewhat disagree | Neutral/ Undecided | Somewhat agree | Agree | Strongly agree |
|--------------------------------------------------------------------------------------------------------|-------------------|----------|-------------------|--------------------|----------------|-------|----------------|
|                                                                                                        | (1)               | (2)      | (3)               | (4)                | (5)            | (6)   | (7)            |
| ACC1: I can use smart tourism technologies anytime and from anywhere during my travels.                |                   |          |                   |                    |                |       |                |
| ACC2: Smart tourism technologies are easily accessible during my travels                               |                   |          |                   |                    |                |       |                |
| ACC3: Smart tourism technologies are easily found and without complicated process when I am traveling. |                   |          |                   |                    |                |       |                |

### 2.3 INTERACTIVITY

|                                                                                                    | Strongly disagree | Disagree | Somewhat disagree | Neutral/ Undecided | Somewhat agree | Agree | Strongly agree |
|----------------------------------------------------------------------------------------------------|-------------------|----------|-------------------|--------------------|----------------|-------|----------------|
| INT1: Smart tourism technologies are interactive when I am traveling                               | (1)               | (2)      | (3)               | (4)                | (5)            | (6)   | (7)            |
| INT2: Smart tourism technologies are highly responsive during my travels                           |                   |          |                   |                    |                |       |                |
| INT3: It is easy to share information and content on smart tourism technologies during my travels. |                   |          |                   |                    |                |       |                |

### 2.4 PERSONALIZATION

|                                                                                                             | Strongly disagree | Disagree | Somewhat disagree | Neutral/ Undecided | Somewhat agree | Agree | Strongly agree |
|-------------------------------------------------------------------------------------------------------------|-------------------|----------|-------------------|--------------------|----------------|-------|----------------|
| PER1: I received customized/tailored information on smart tourism technologies when I am traveling          | (1)               | (2)      | (3)               | (4)                | (5)            | (6)   | (7)            |
| PER2: Smart tourism technologies provide me with easy-to-follow links and tips while traveling,             |                   |          |                   |                    |                |       |                |
| PER3: I can get personalized information through interaction on smart tourism technologies while traveling. |                   |          |                   |                    |                |       |                |

### 2.5 SECURITY

|                                                                                 | Strongly disagree | Disagree | Somewhat disagree | Neutral/ Undecided | Somewhat agree | Agree | Strongly agree |
|---------------------------------------------------------------------------------|-------------------|----------|-------------------|--------------------|----------------|-------|----------------|
| SEC1: Smart tourism technologies protect my personal and sensitive information. | (1)               | (2)      | (3)               | (4)                | (5)            | (6)   | (7)            |

|                                                                                 |  |  |  |  |  |  |  |
|---------------------------------------------------------------------------------|--|--|--|--|--|--|--|
| SEC2: Smart tourism technologies respect my privacy and safety of transactions. |  |  |  |  |  |  |  |
| SEC3: Smart tourism technologies are trustful and reliable.                     |  |  |  |  |  |  |  |

**2.6. What is your general opinion about smart tourism technologies? The respondent is asked to consider the following statements and express his/her opinion, level of agreement on these (*Only one choice✓*)**

|                                                                              | Strongly disagree | Disagree | Somewhat disagree | Neutral/ Undecided | Somewhat agree | Agree | Strongly agree |
|------------------------------------------------------------------------------|-------------------|----------|-------------------|--------------------|----------------|-------|----------------|
| GO1: My general opinion about smart tourism technologies (STTs) is positive  | (1)               | (2)      | (3)               | (4)                | (5)            | (6)   | (7)            |
| GO2: I believe that using STTs gives opportunities to have better experience |                   |          |                   |                    |                |       |                |
| GO3: Using STTs is an excellent idea.                                        |                   |          |                   |                    |                |       |                |

### SECTION 3: OUTCOMES/RESULTS OF THE USAGE OF STTs

#### 3.1 PERCEIVED VALUE

|                                                                                                   | Strongly disagree | Disagree | Somewhat disagree | Neutral/ Undecided | Somewhat agree | Agree | Strongly agree |
|---------------------------------------------------------------------------------------------------|-------------------|----------|-------------------|--------------------|----------------|-------|----------------|
| PV1: Considering the price I paid, it is worth using smart tourism technologies                   | (1)               | (2)      | (3)               | (4)                | (5)            | (6)   | (7)            |
| PV2: Considering the time devoted and effort put to, it is worth using smart tourism technologies |                   |          |                   |                    |                |       |                |
| PV3: The overall value of using smart tourism technologies is high; high value for money.         |                   |          |                   |                    |                |       |                |
| PV4: I have a very good feeling about the experience with smart tourism technologies              |                   |          |                   |                    |                |       |                |

|                                                                             |  |  |  |  |  |  |  |
|-----------------------------------------------------------------------------|--|--|--|--|--|--|--|
| PV5: The use of smart travel technologies is pleasant and entertaining/fun. |  |  |  |  |  |  |  |
|-----------------------------------------------------------------------------|--|--|--|--|--|--|--|

### 3.2 SATISFACTION

|                                                                            | Strongly disagree | Disagree | Somewhat disagree | Neutral/ Undecided | Somewhat agree | Agree | Strongly agree |
|----------------------------------------------------------------------------|-------------------|----------|-------------------|--------------------|----------------|-------|----------------|
| SAT1: I am happy with the STT experience in this visitor attraction.       | (1)               | (2)      | (3)               | (4)                | (5)            | (6)   | (7)            |
| SAT2: I really enjoy using STTs                                            |                   |          |                   |                    |                |       |                |
| SAT3: I am delighted to use STT in this visitor attraction.                |                   |          |                   |                    |                |       |                |
| SAT4: I am satisfied with the experience service quality provided by STTs. |                   |          |                   |                    |                |       |                |

### 3.3 BEHAVIORAL INTENTIONS REGARDING STTs

#### 3.3.1 Word-of-Mouth (WOM) recommendations

|                                                                            | Strongly disagree | Disagree | Somewhat disagree | Neutral/ Undecided | Somewhat agree | Agree | Strongly agree |
|----------------------------------------------------------------------------|-------------------|----------|-------------------|--------------------|----------------|-------|----------------|
| WOM1: I would recommend the STTs to my family, friends and peers           | (1)               | (2)      | (3)               | (4)                | (5)            | (6)   | (7)            |
| WOM2: I would tell my family about the positive experience of STTs         |                   |          |                   |                    |                |       |                |
| WOM3: I will speak highly (say positive things about) of STTs              |                   |          |                   |                    |                |       |                |
| WOM4: I will post positive reviews and comments about STTs on social media |                   |          |                   |                    |                |       |                |

#### 3.3.2 Reuse/Repurchase Intention

|                                                             | Strongly disagree | Disagree | Somewhat disagree | Neutral/ Undecided | Somewhat agree | Agree | Strongly agree |
|-------------------------------------------------------------|-------------------|----------|-------------------|--------------------|----------------|-------|----------------|
| RIN1: I want to experience the STTs again in the future     | (1)               | (2)      | (3)               | (4)                | (5)            | (6)   | (7)            |
| RIN2: I would like to use again STTs in visitor attractions |                   |          |                   |                    |                |       |                |

|                                                                                                |  |  |  |  |  |  |  |
|------------------------------------------------------------------------------------------------|--|--|--|--|--|--|--|
| or other tourism settings.                                                                     |  |  |  |  |  |  |  |
| RIN3: I plan to visit again the visitor attractions having STTs in the future                  |  |  |  |  |  |  |  |
| RIN4: If I visit a visitor attraction again, one of the main motivations is to use STTs again. |  |  |  |  |  |  |  |

### 3.3.3 Willingness to Pay for a Price Premium

|                                                                                                     | Strongly disagree | Disagree | Somewhat disagree | Neutral/ Undecided | Somewhat agree | Agree | Strongly agree |
|-----------------------------------------------------------------------------------------------------|-------------------|----------|-------------------|--------------------|----------------|-------|----------------|
| WPP1: I am willing to pay a premium for STTs in general                                             | (1)               | (2)      | (3)               | (4)                | (5)            | (6)   | (7)            |
| WPP2: I can accept the price increase of intelligent tourism technology                             |                   |          |                   |                    |                |       |                |
| WPP3: I am willing to pay higher price for tourist attraction offering smart tourism infrastructure |                   |          |                   |                    |                |       |                |

## SECTION 4: PERSONAL DATA – INFORMATION

### 4.1 Gender:

|        |  |
|--------|--|
| Male   |  |
| Female |  |

### 4.2 Age group (years):

|          |  |
|----------|--|
| 18 -     |  |
| 18 to 25 |  |
| 26 to 30 |  |
| 31 to 40 |  |
| 41 to 50 |  |
| 51 to 60 |  |
| 60 +     |  |

### 4.3 Area of permanent/principal residence: Living in

|        |  |
|--------|--|
| City   |  |
| County |  |
| Town   |  |

### 4.4 Educational level

|                                 |  |
|---------------------------------|--|
| Junior school and below         |  |
| High school or equivalent       |  |
| University or equivalent        |  |
| Master and above (postgraduate) |  |

#### 4.5 Profession/Capacity

Do you have any work/professional capacity?

|                                                              |  |
|--------------------------------------------------------------|--|
| Professional and technical personnel                         |  |
| The tertiary industry service personnel                      |  |
| Enterprise staff                                             |  |
| public sector employees, civil servants,<br>government staff |  |
| government staff                                             |  |
| freelancer                                                   |  |
| Worker                                                       |  |
| laborer engaged in forestry                                  |  |
| Other                                                        |  |

**4.6 Visits/experiences:** How many times have you visited a tourist site/attraction having smart tourism technologies?

|         |  |
|---------|--|
| 1 to 2  |  |
| 3 to 4  |  |
| 5 to 7  |  |
| 8 to 10 |  |
| 10 +    |  |

We would like to thank you for your time and cooperation.

The Research Team  
Ningbo University
